# Supplementary material for: Hydrogen production by electrochemical reaction using ethylene glycol with terephthalic acid
Source: Royal Society of Chemistry journal article supplement (doi:10.1039/d0ra10187g), 2021-01-01
Supplement: d0ra10187g1.pdf [file d0ra10187g1.pdf]

## Supporting Information

### Hydrogen Production by Electrochemical Reaction Using Ethylene Glycol with Terephthalic

#### Acid

Se-Hyun Kim<sup>a</sup>, Sang-Won Woo<sup>a</sup>, Chan-Soo Kim<sup>b</sup>, Sung-Eun Lee<sup>\*c</sup> and

Tae-Oh Kim<sup>\*a</sup>

<sup>a</sup> *Department of Environmental Engineering, Kumoh National Institute of Technology, Gumi 39177, Republic of Korea*

<sup>b</sup> *Marine Energy Convergence & Integration Laboratory, Jeju Global Research Center, Korea Institute of Energy Research, Jeju, Republic of Korea*

<sup>c</sup> *School of Applied Biosciences, Kyungpook National University, Daegu 41566, Republic of Korea*

<sup>d</sup> *Department of Energy Engineering Convergence, Kumoh National Institute of Technology, Gumi 39177, Republic of Korea*

\*Corresponding author.

*E-mail address:* selpest@knu.ac.kr(Sung-Eun Lee), tokim@kumoh.ac.kr(Tae-Oh Kim)

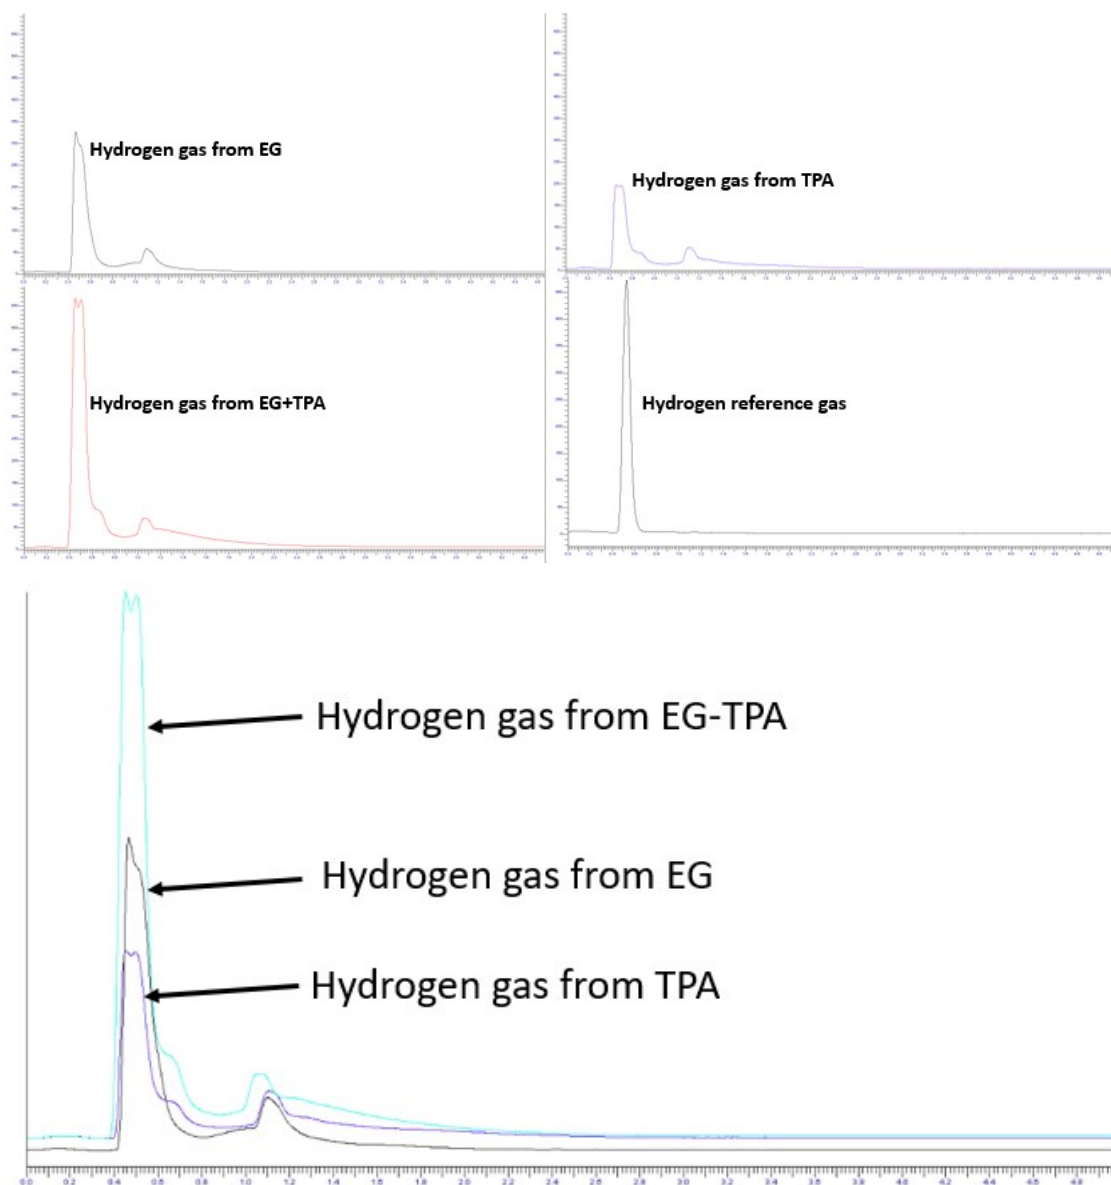

**Fig. S1.** EG 1.0M and TPA 10 mM chromatograms in 0.1 M aqueous KOH solution at 1.6 V

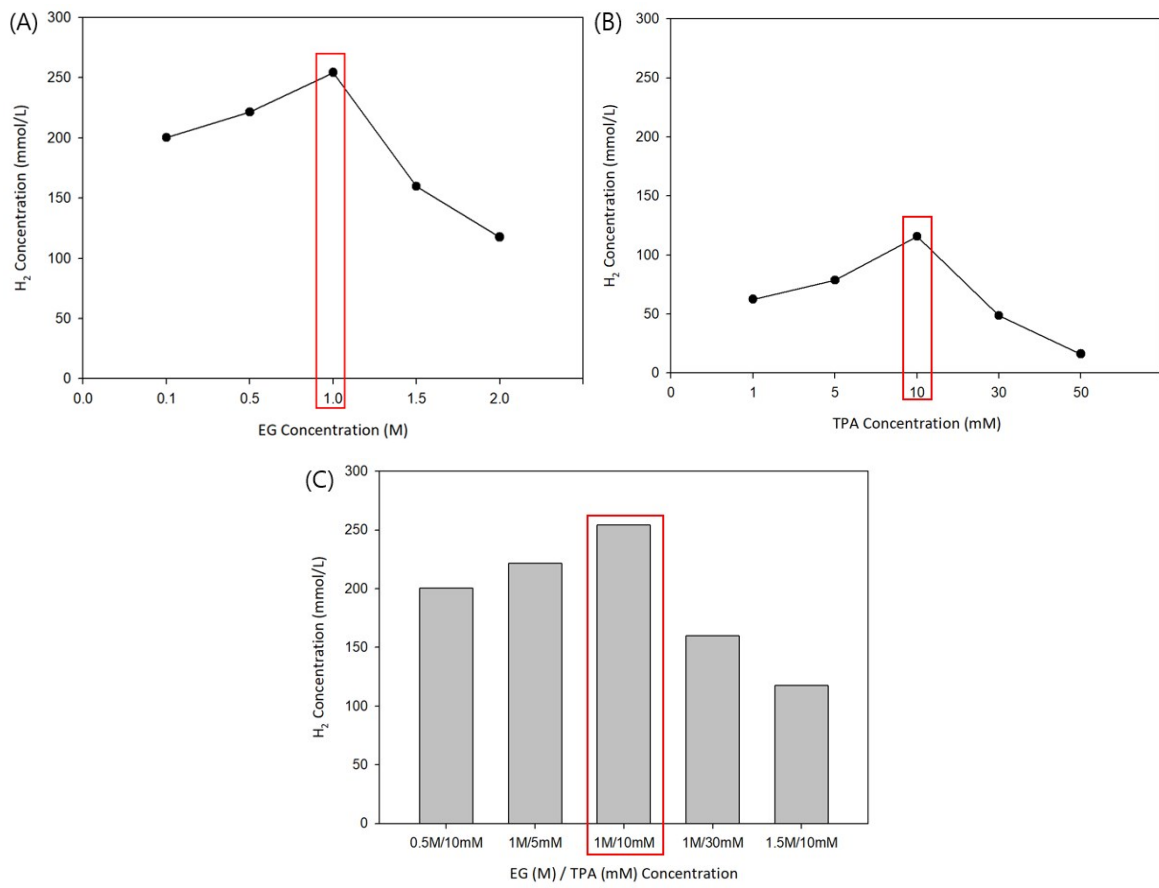

**Fig. S2.** The amount of hydrogen produced rate according to the concentration of EG and TPA at 0.1M KOH capacity at 1.6V in (A) EG, (B) TPA, (C) EG-TPA

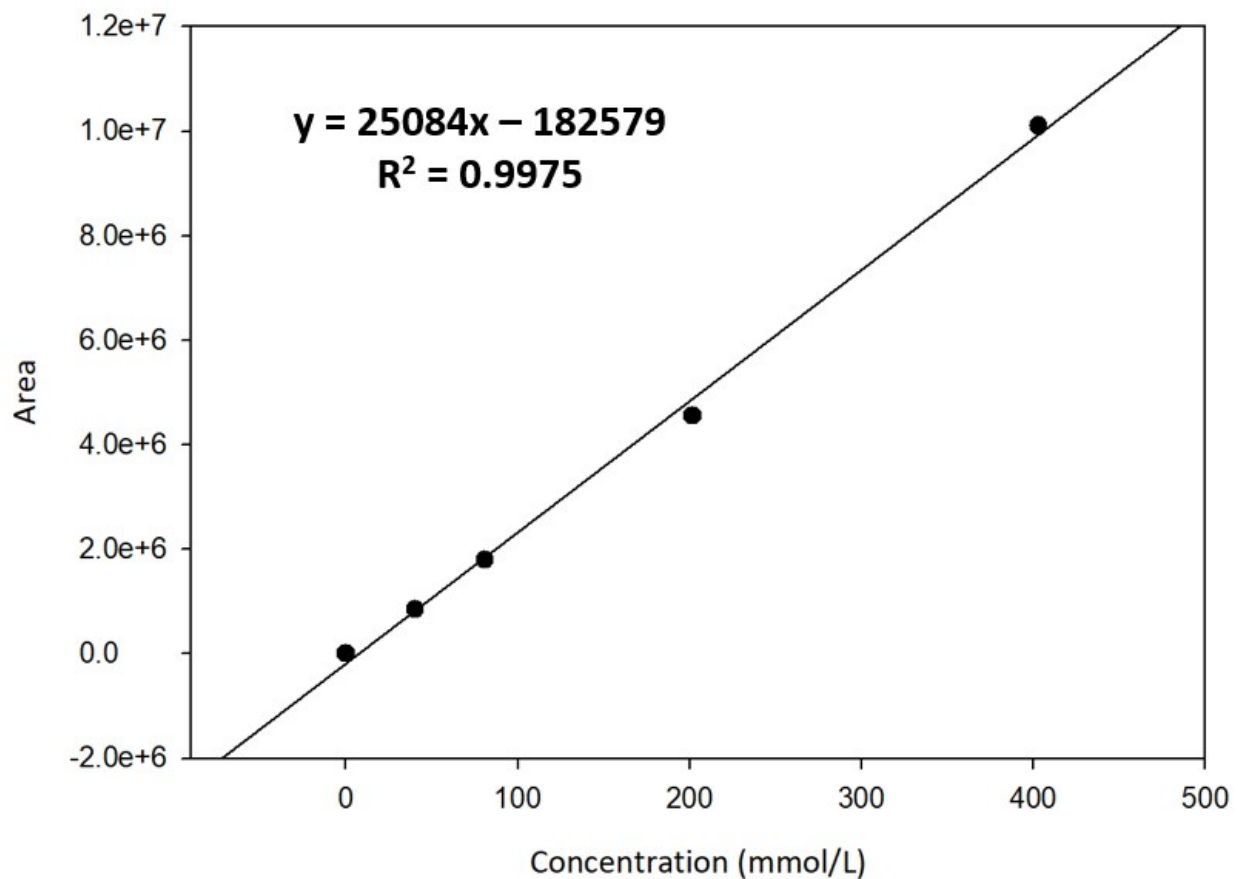

**Fig. S3.** Calibration curve for hydrogen generation analysis for EG and TPA

**Table S1.** Original quantification data corresponding to Fig. 6(a)

| Time        | Area        | Con(mmol/L) |
|-------------|-------------|-------------|
| None(30min) | 757794.841  | 38.179      |
| 45min       | 1355346.925 | 62.272      |
| 60min       | 1740133.631 | 77.787      |
| 75min       | 1795026.984 | 80.000      |
| 90min       | 1795959.524 | 80.038      |
| 105min      | 1857030.952 | 82.500      |
| 120min      | 1919034.921 | 85.000      |
| EG(30min)   | 3420525.496 | 145.540     |
| 45min       | 4008112.302 | 169.232     |
| 60min       | 4595699.107 | 192.923     |
| 75min       | 4879501.190 | 204.366     |

|               |             |         |
|---------------|-------------|---------|
| 90min         | 5049312.698 | 211.213 |
| 105min        | 5107353.373 | 213.553 |
| 120min        | 5267249.206 | 220.000 |
| TPA(30min)    | 1327174.802 | 61.136  |
| 45min         | 1695820.635 | 76.000  |
| 60min         | 2017911.409 | 88.987  |
| 75min         | 2281959.028 | 99.633  |
| 90min         | 2479374.702 | 107.593 |
| 105min        | 2553211.508 | 110.570 |
| 120min        | 2553779.464 | 110.593 |
| EG+TPA(30min) | 3640133.631 | 154.393 |
| 45min         | 4653831.548 | 195.267 |
| 60min         | 5649149.008 | 235.398 |
| 75min         | 6372507.143 | 264.564 |
| 90min         | 6722095.437 | 278.659 |
| 105min        | 6756609.325 | 280.051 |
| 120min        | 6751611.806 | 279.845 |

**Table S2.** Original quantification data corresponding to Fig. 6(b)

| Voltage      | Area        | Con(mmol/L) |
|--------------|-------------|-------------|
| None(1.2V)   | 0           | 0           |
| 1.4V         | 65565.179   | 10.268      |
| 1.6V         | 944612.798  | 45.711      |
| 1.8V         | 3553779.464 | 150.913     |
| EG(1.2V)     | 207725.397  | 16.000      |
| 1.4V         | 1138561.210 | 53.531      |
| 1.6V         | 2748194.147 | 118.432     |
| 1.8V         | 6259312.698 | 260.000     |
| TPA(1.2V)    | 0           | 0           |
| 1.4V         | 258404.960  | 18.043      |
| 1.6V         | 1948442.163 | 86.186      |
| 1.8V         | 4823645.536 | 202.114     |
| EG+TPA(1.2V) | 0           | 0           |
| 1.4V         | 258404.960  | 18.043      |
| 1.6V         | 1948442.163 | 86.186      |
| 1.8V         | 4823645.536 | 202.114     |
